# Supplementary material for: Dark Diazotrophy during the Late Summer in Surface Waters of Chile Bay, West Antarctic Peninsula
Source: MDPI journal article supplement (doi:10.3390/microorganisms10061140), 2022-05-31
Supplement: s1 [file s1]

**Table S1.** Chemoautotroph organisms in *nifH* phylogenetic tree related with diazotrophs from Chile Bay

| Organism                              | Family                   | Metabolic class | Cluster | Reference | Percentage of identical matches* | e-value* |
|---------------------------------------|--------------------------|-----------------|---------|-----------|----------------------------------|----------|
| <i>Methylocapsa palsarum</i>          | <i>Beijerinckiaceae</i>  | Methanotroph    | 1       | [112]     | 93.39%                           | 3.40E-84 |
| <i>Methyloceanibacter</i> sp. wino2   | <i>Hyphomicrobiaceae</i> | Methylotroph    | 1       | [113]     | 93.39%                           | 1.53E-84 |
| <i>Methyloceanibacter stevinii</i>    | <i>Hyphomicrobiaceae</i> | Methanotroph    | 1       | [114]     | 92.56%                           | 5.74E-84 |
| <i>Methylocystis bryophila</i>        | <i>Methylocystaceae</i>  | Methanotroph    | 1       | [115]     | 95.04%                           | 1.51E-84 |
| <i>Methylocystis</i> sp. SC2          | <i>Methylocystaceae</i>  | Methanotroph    | 1       | [116]     | 97.52%                           | 2.10E-87 |
| <i>Xanthobacter autotrophicus</i> Py2 | <i>Xanthobacteraceae</i> | Methylotroph    | 1       | [117]     | 95.87%                           | 1.26E-86 |

\*Values of BLASTP against the Chile Bay NifH reads.
